# Supplementary material for: Clinical Spectrum of Obesity and Mutations in the Melanocortin 4 Receptor Gene
Source: Atypon-hosted journal article supplement (doi:10.1056/nejmoa022050), 2003-03-19

# Supplementary Appendix

This appendix has been provided by the authors to give readers additional information about their work.

Supplement to: Sadaf Farroqi I, Keogh JM, Yeo GSH, et al. Clinical Spectrum of Obesity and Mutations in the Melanocortin 4 Receptor Gene. *N Engl J Med* 2003;348:1085-95.

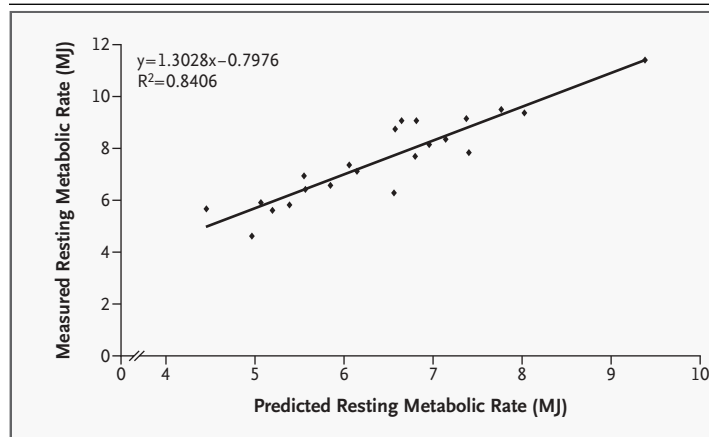

**Supplementary Appendix 1.** Measured Resting Metabolic Rate in Adult Subjects with Melanocortin 4 Receptor Deficiency, as Compared with the Predicted Rate.

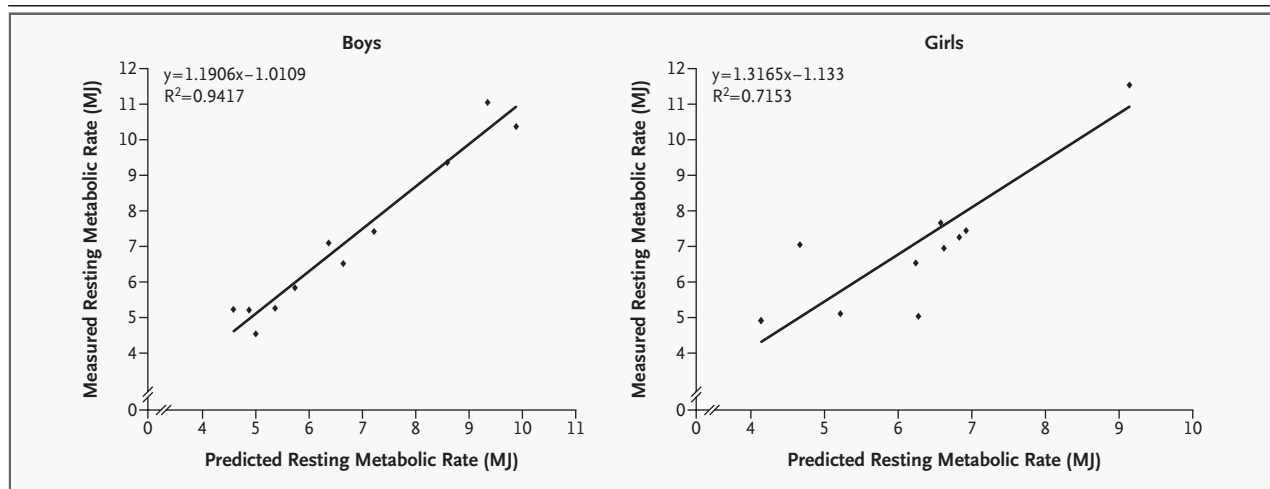

**Supplementary Appendix 2.** Measured Resting Metabolic Rate in Boys and Girls with Melanocortin 4 Receptor Deficiency, as Compared with the Predicted Rate.

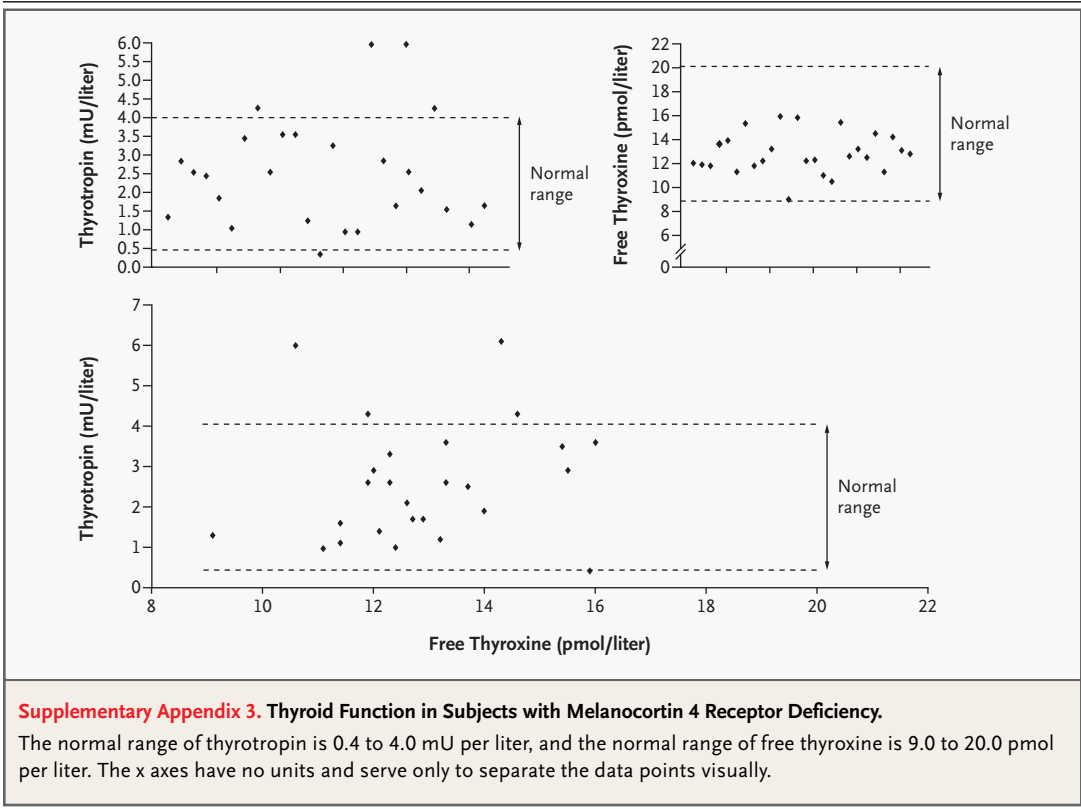

Supplement: nejm_farroqi_1085sa1-3.pdf [file nejm_farroqi_1085sa1-3.pdf]
